# Supplementary material
Source: MDPI journal article supplement (https://www.mdpi.com/2072-4292/13/2/320)
Supplement: s1 [file s1]

## Supplementary Materials

**Table S1.** Sentinel-2 scenes used in this study, with indication of the estimated height of the water at Bubaque at the time of image acquisition and of the corresponding tidal stage.

| Image | Date     | Sensor | Water Height at Image Acquisition<br>(m) | Tidal Stage |
|-------|----------|--------|------------------------------------------|-------------|
| 1     | 06/12/17 | S2B    | 4.34                                     | Rising      |
| 2     | 26/12/17 | S2B    | 1.62                                     | Rising      |
| 3     | 10/01/18 | S2A    | 1.39                                     | Rising      |
| 4     | 15/01/18 | S2B    | 2.9                                      | Ebbing      |
| 5     | 20/01/18 | S2A    | 3.88                                     | Rising      |
| 6     | 25/01/18 | S2B    | 1.37                                     | Rising      |
| 7     | 30/01/18 | S2A    | 3.07                                     | Ebbing      |
| 8     | 09/02/18 | S2B    | 1.52                                     | Rising      |
| 9     | 19/02/18 | S2A    | 3.97                                     | Rising      |
| 10    | 01/03/18 | S2A    | 3.69                                     | Ebbing      |
| 11    | 06/03/18 | S2B    | 3.6                                      | Rising      |
| 12    | 21/03/18 | S2A    | 4.01                                     | Rising      |
| 13    | 31/03/18 | S2A    | 4.04                                     | Ebbing      |
| 14    | 05/04/18 | S2B    | 3.36                                     | Rising      |
| 15    | 15/04/18 | S2B    | 3.76                                     | Ebbing      |
| 16    | 25/04/18 | S2B    | 1.35                                     | Ebbing      |
| 17    | 30/04/18 | S2A    | 4.23                                     | Ebbing      |
| 18    | 10/05/18 | S2A    | 1.66                                     | Ebbing      |
| 19    | 21/11/19 | S2A    | 1.1                                      | Rising      |
| 20    | 26/11/19 | S2B    | 3.79                                     | Ebbing      |
| 21    | 01/12/19 | S2A    | 3.15                                     | Rising      |
| 22    | 06/12/19 | S2B    | 1.52                                     | Ebbing      |
| 23    | 21/12/19 | S2A    | 1.04                                     | Ebbing      |
| 24    | 26/12/19 | S2B    | 3.87                                     | Ebbing      |
| 25    | 05/01/20 | S2B    | 1.52                                     | Rising      |
| 26    | 04/02/20 | S2B    | 1.55                                     | Ebbing      |
| 27    | 14/02/20 | S2B    | 2.72                                     | Rising      |
| 28    | 29/02/20 | S2A    | 2.87                                     | Rising      |
| 29    | 05/03/20 | S2B    | 1.69                                     | Ebbing      |
| 30    | 15/03/20 | S2B    | 2.51                                     | Rising      |
| 31    | 20/03/20 | S2A    | 2.17                                     | Ebbing      |
| 32    | 30/03/20 | S2A    | 2.84                                     | Rising      |
| 33    | 04/04/20 | S2B    | 1.78                                     | Ebbing      |
| 34    | 09/04/20 | S2A    | 4.69                                     | Ebbing      |
| 35    | 19/04/20 | S2A    | 2.45                                     | Ebbing      |

**Table S2.** Estimated and measured tide delay (minutes). Measured delays were provided by Portuguese Hydrographic Institute at four locations: Abú, Bruce, Eguba and Uno, see Figure 1. The mean absolute difference is 6.6 min (n = 5).

| Name    | Location             | Difference in Tidal-Stage (min) |                                        |
|---------|----------------------|---------------------------------|----------------------------------------|
|         |                      | Estimated by the Model          | Provided by the HYDROGRAPHIC Institute |
| Abú     | 11°27.3'N; 15°54.2'W | 25                              | 40                                     |
| Bruce   | 11°12.1'N; 15°50.3'W | -24                             | -15                                    |
| Eguba   | 11°19.7'N; 16°01.5'W | 9                               | 5                                      |
| Uno     | 11°14.5'N; 16°09.7'W | -16                             | -20                                    |
| Bubaque | 11°18.1'N; 15°50.0'W | 1                               | 0                                      |

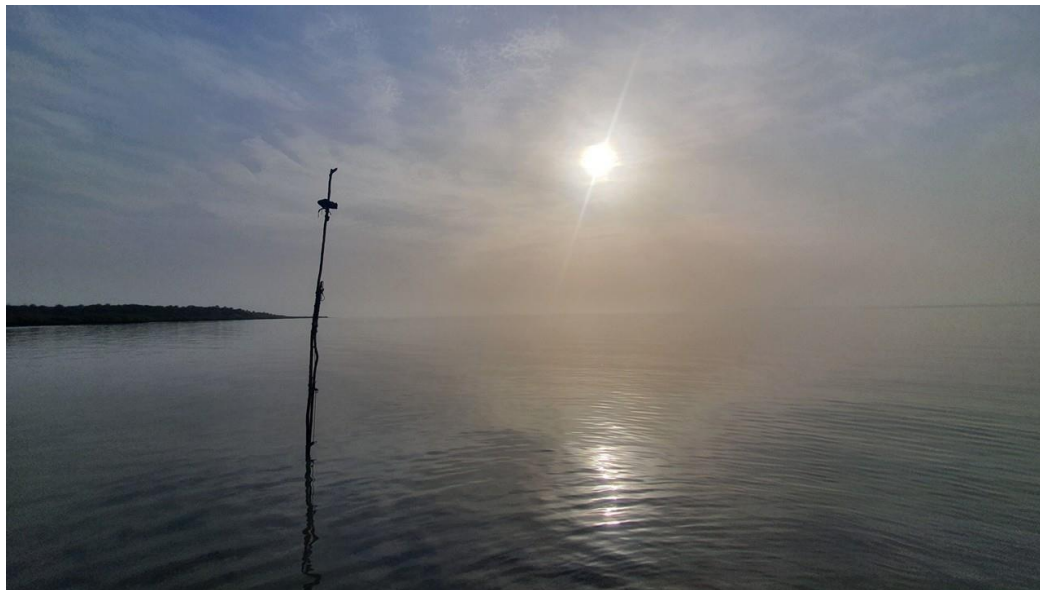

**Figure S1.** Time-lapse cameras pointing down and set to detect the exposure period of intertidal sampling points.

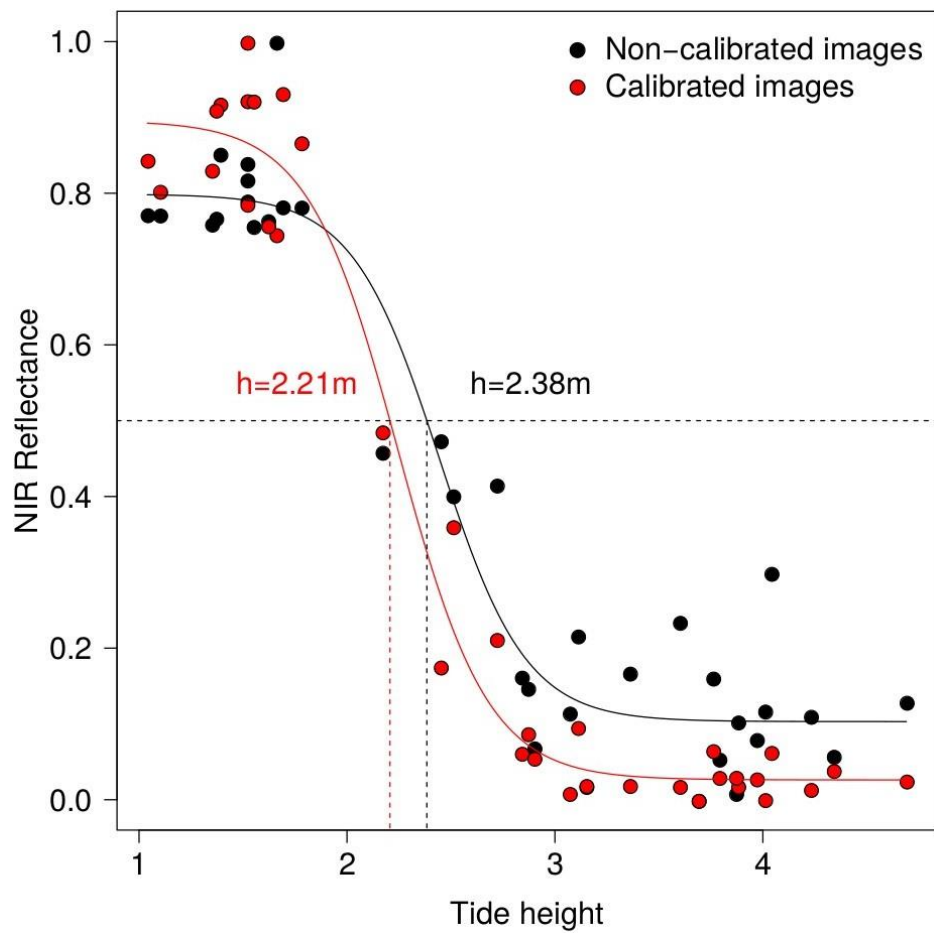

**Figure S2.** Example of the application of the logistic function to reflectance of a sample pixel, using images that were (red dots) and were not inter-calibrated (black dots), and its effects on the estimation of the height of the pixel. Note the reduction in variability, particularly on lower values of NIR reflectance.

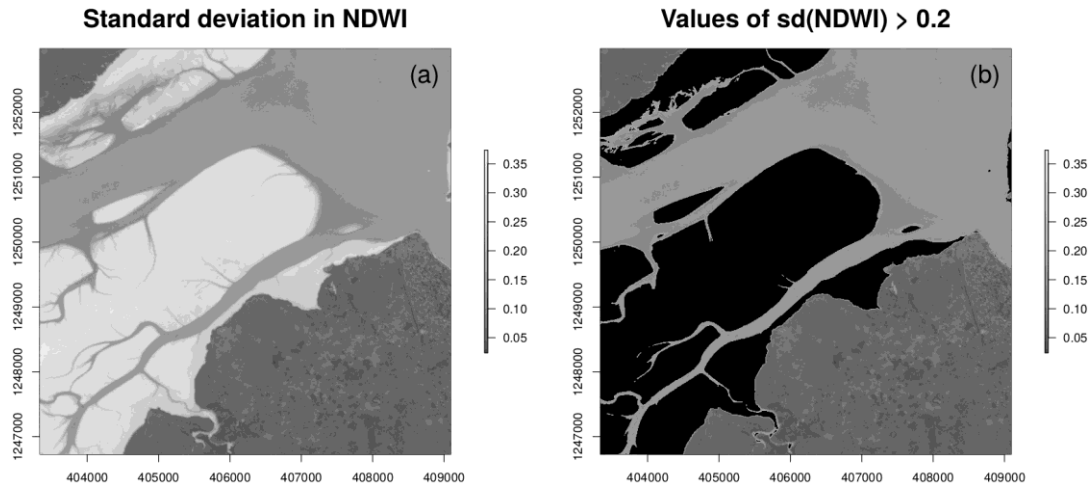

**Figure S3.** Temporal variability of the *NDWI* of the 35 Sentinel-2 scenes in a small part of the study area (a), showing the clear distinction between land (darker regions, with low variability), water (medium variability) and intertidal areas (clear colors, corresponding to high variability). Panel (b) shows the areas with values of variability higher than 0.2 (see methods).

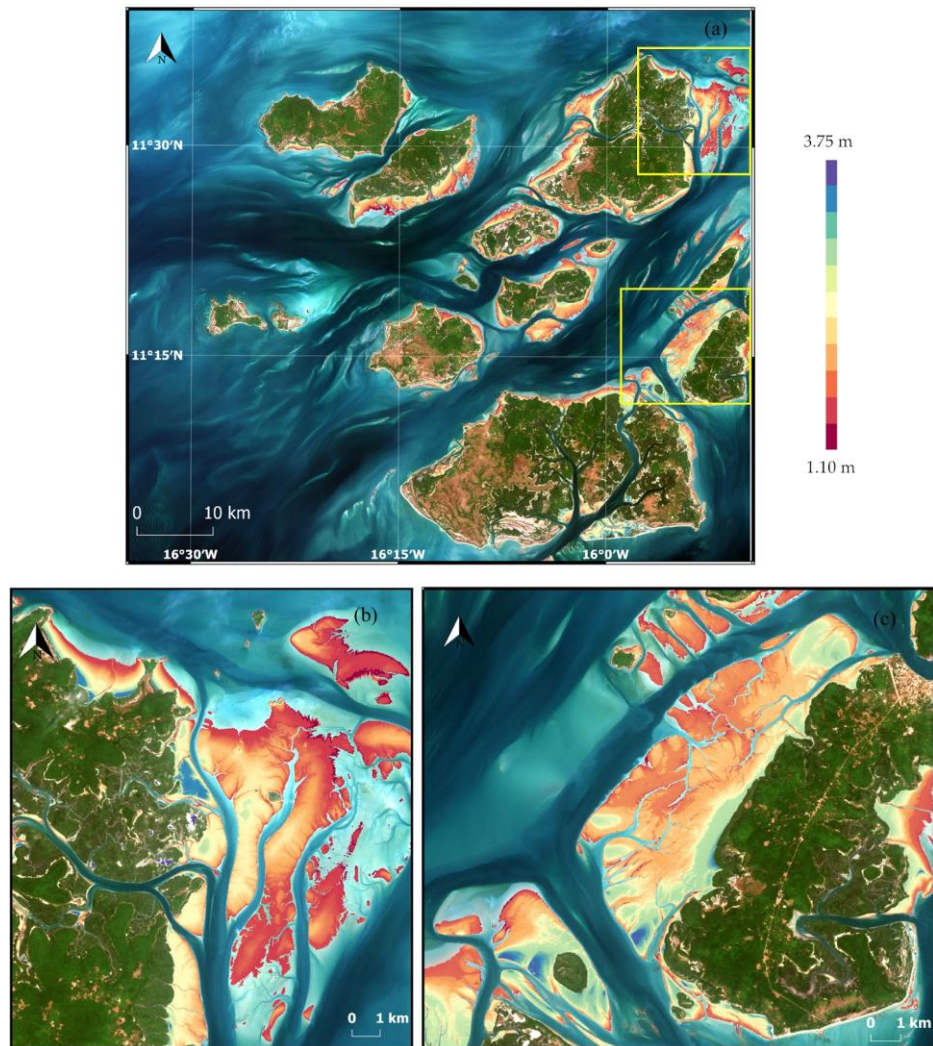

**Figure S4.** DEM of the Bijagós archipelago obtained by recalculation of height of water at each pixel in all images, according to the tide-stage differences estimated for each pixel.
